# Supplementary material
Source: PubMed Central journal article supplement (PMC2932553)
Supplement: Supp_Data.pdf [file Supp_Data.pdf]

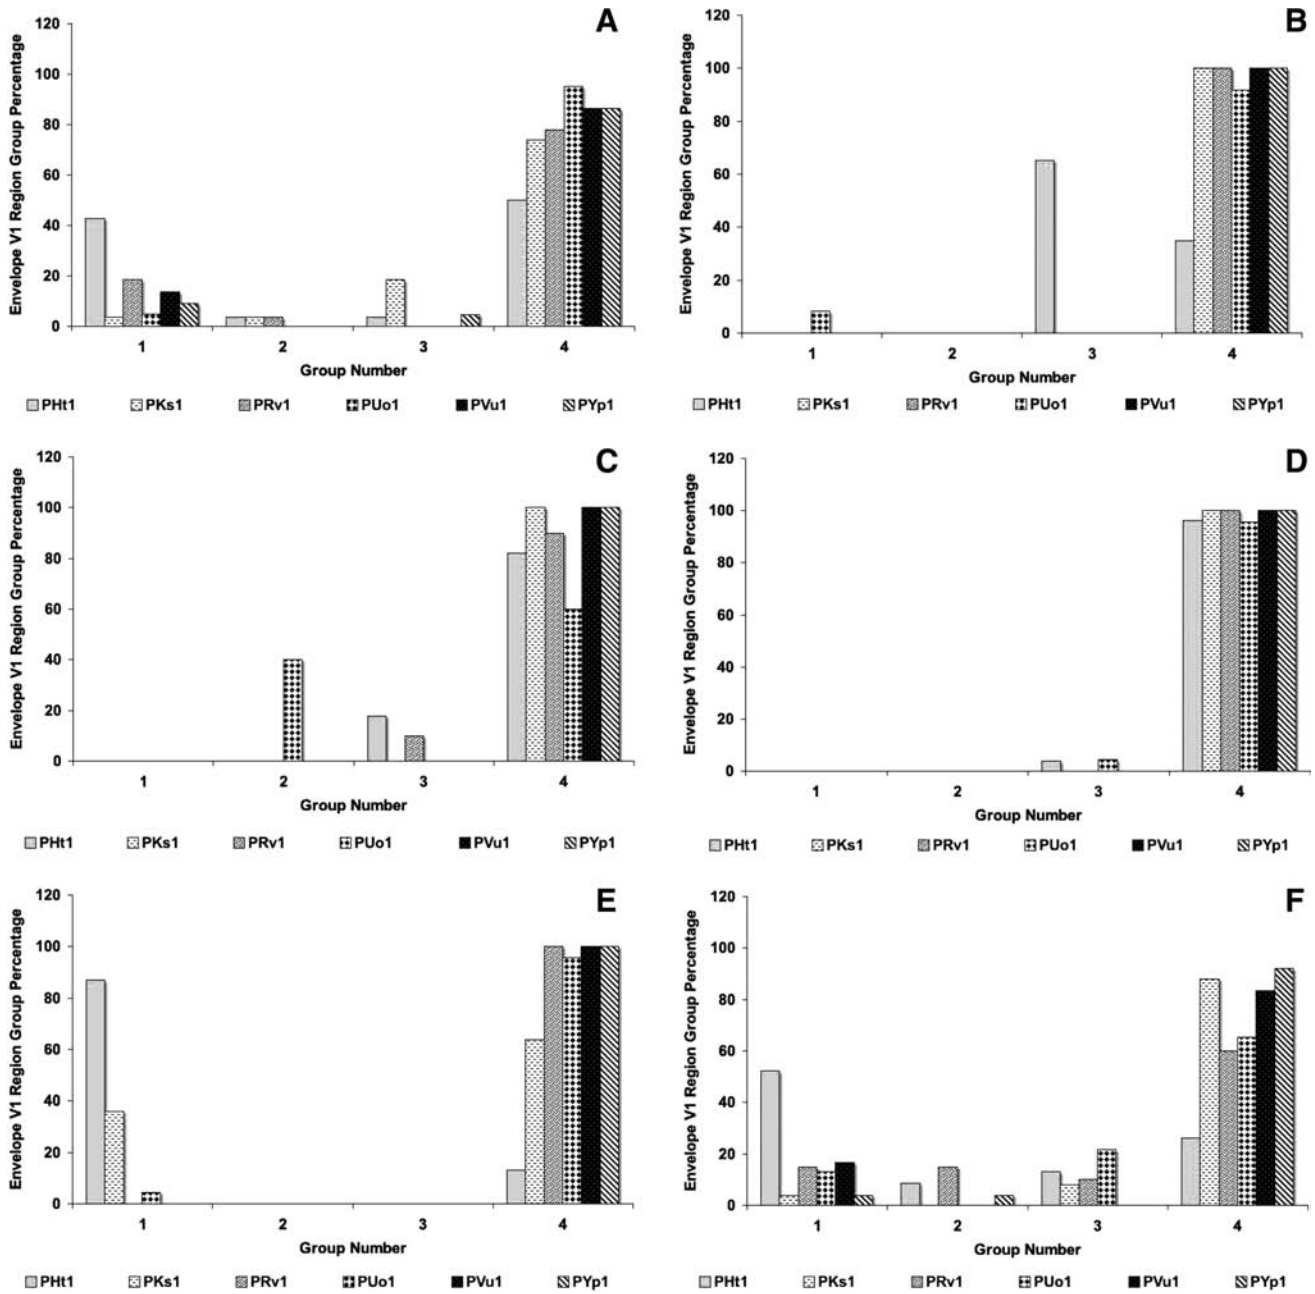

**SUPPLEMENTAL FIG. 1.** Comparison of Env V1 region group percentages obtained from tissues harvested from pigtailed macaques at 2 m.p.i. Env V1 amino acid sequences obtained from the SIV<sub>smm</sub>FGb stock virus were aligned and grouped as previously described.<sup>17</sup> Env V1 amino acid sequences from tissues were aligned with SIV<sub>smm</sub>FGb stock virus Env V1 consensus sequences and grouped as described in Materials and Methods. The percentage of sequences in each group from each tissue was determined for each animal. Results are shown for (A) axillary lymph node, (B) basal ganglia, (C) cerebellum, (D) midfrontal cortex, (E) hippocampus, and (F) mesenteric lymph node.

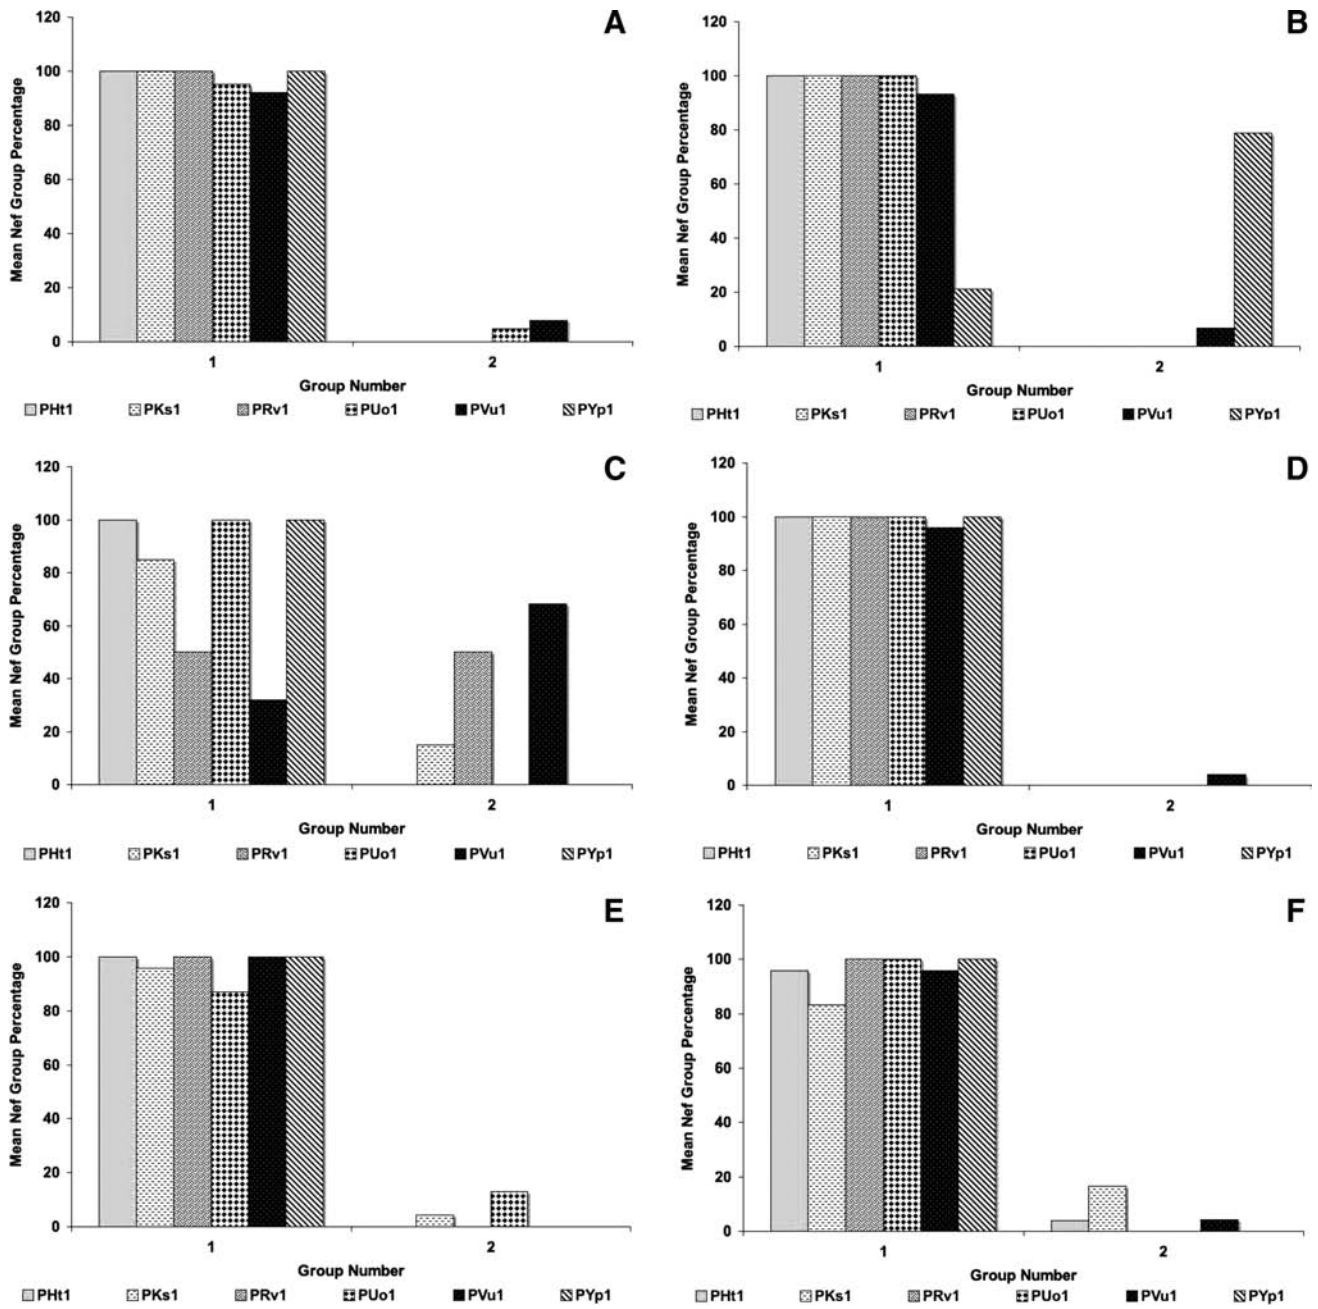

**SUPPLEMENTAL FIG. 2.** Comparison of Nef group percentages obtained from tissues harvested from pigtailed macaques at 2 m.p.i. Nef amino acid sequences obtained from the SIVsmmFGb stock virus were aligned and grouped as previously described.<sup>17</sup> Nef amino acid sequences from tissues were aligned with SIVsmmFGb stock virus Nef consensus sequences and grouped as described in Materials and Methods. The percentage of sequences in each group from each tissue was determined for each animal. Results are shown for (A) axillary lymph node, (B) basal ganglia, (C) cerebellum, (D) midfrontal cortex, (E) hippocampus, and (F) mesenteric lymph node.

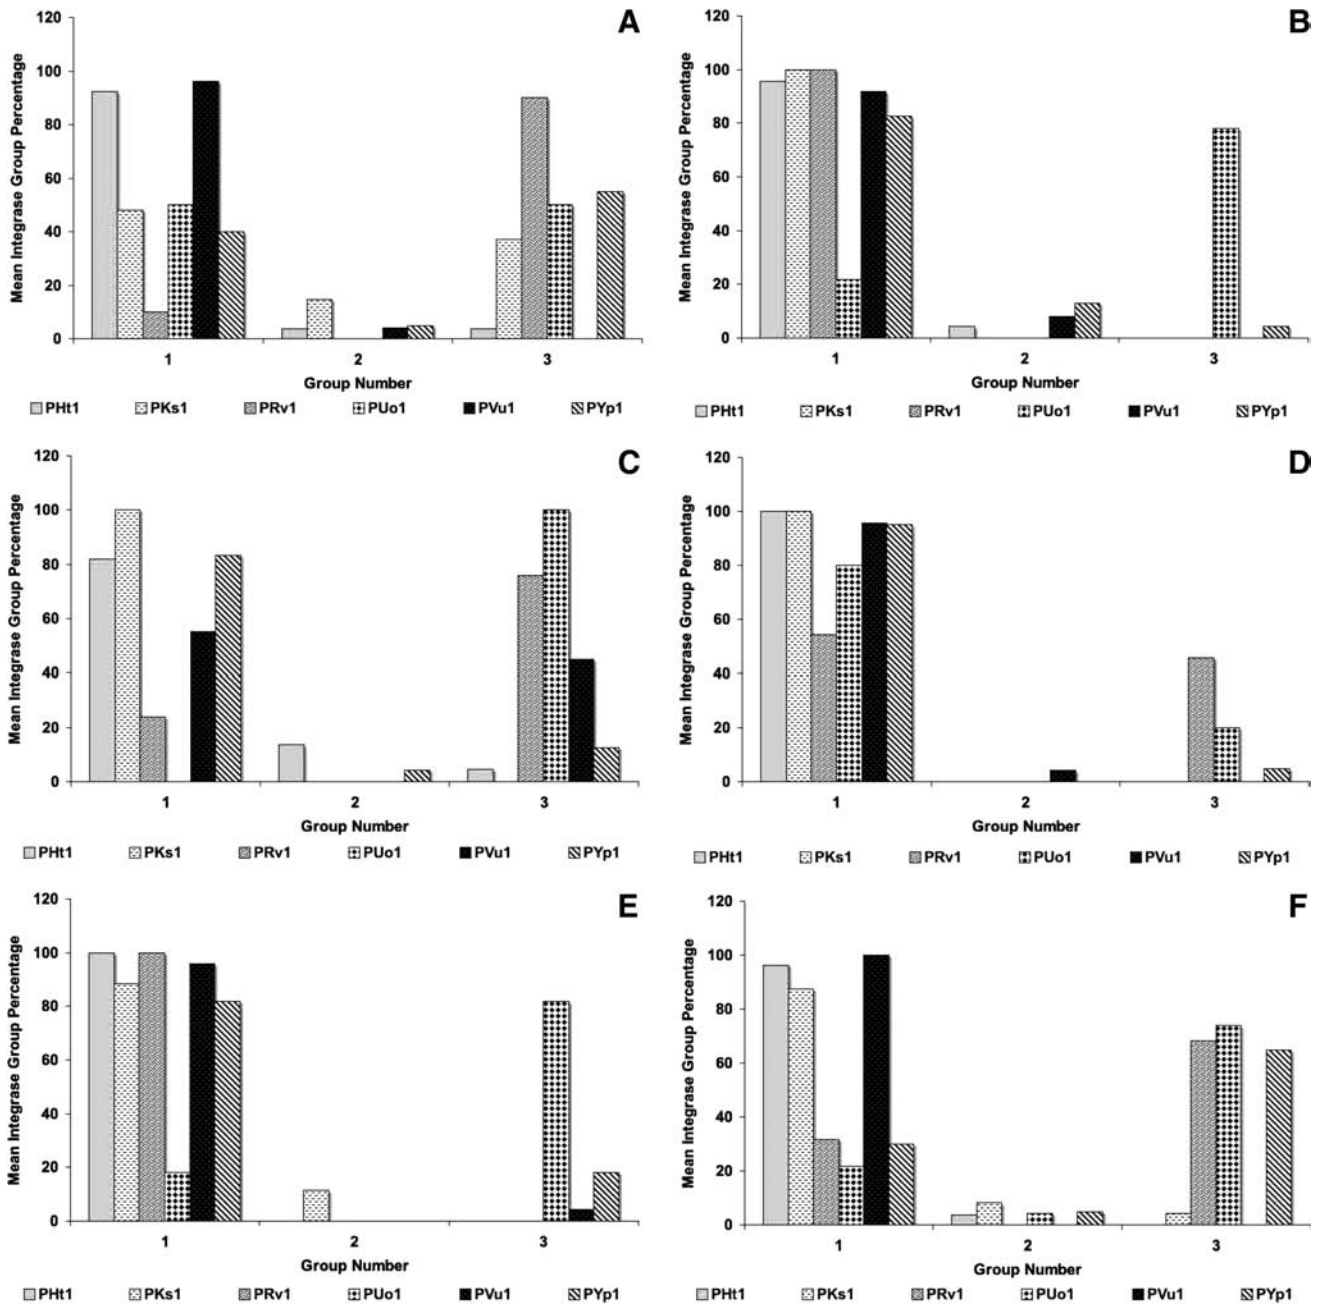

**SUPPLEMENTAL FIG. 3.** Comparison of Int group percentages obtained from tissues harvested from pigtailed macaques at 2 m.p.i. Int amino acid sequences obtained from the SIVsmmFGb stock virus were aligned and grouped as previously described.<sup>17</sup> Int amino acid sequences from tissues were aligned with SIVsmmFGb stock virus Int consensus sequences and grouped as described in Materials and Methods. The percentage of sequences in each group from each tissue was determined for each animal. Results are shown for (A) axillary lymph node, (B) basal ganglia, (C) cerebellum, (D) midfrontal cortex, (E) hippocampus, and (F) mesenteric lymph node.

SUPPLEMENTARY TABLE 1. MANTEL'S TEST RESULTS FOR INTER-TISSUE COMPARTMENTALIZATION OF ENV V1 REGIONS IN SIVSMMFGB-INFECTED PIGTAILED MACAQUES

| <i>PHt1</i> | <i>Pearson's Correlation Coefficient</i> | <i>p Value</i> | <i>PKs1</i> | <i>Pearson's Correlation Coefficient</i> | <i>p Value</i> | <i>PRv1</i> | <i>Pearson's Correlation Coefficient</i> | <i>p Value</i> |
|-------------|------------------------------------------|----------------|-------------|------------------------------------------|----------------|-------------|------------------------------------------|----------------|
| A×B         | 0.081                                    | 0.007          | A×B         | 0.180                                    | 0.001          | A×B         | 0.050                                    | 0.069          |
| A×C         | 0.166                                    | 0.001          | A×C         | 0.029                                    | 0.299          | A×C         | -0.039                                   | 0.195          |
| A×F         | 0.121                                    | 0.001          | A×F         | 0.141                                    | 0.001          | A×F         | 0.096                                    | 0.001          |
| A×H         | 0.113                                    | 0.001          | A×H         | 0.206                                    | 0.001          | A×H         | 0.007                                    | 0.727          |
| A×M         | -0.024                                   | 0.405          | A×M         | 0.005                                    | 0.939          | A×M         | -0.010                                   | 0.717          |
| B×C         | 0.112                                    | 0.001          | B×C         | 0.609                                    | 0.001          | B×C         | 0.210                                    | 0.001          |
| B×F         | 0.183                                    | 0.001          | B×F         | 0.724                                    | 0.001          | B×F         | 0.962                                    | 0.001          |
| B×H         | 0.209                                    | 0.001          | B×H         | 0.283                                    | 0.001          | B×H         | 0.008                                    | 0.799          |
| B×M         | 0.155                                    | 0.001          | B×M         | 0.128                                    | 0.001          | B×M         | 0.171                                    | 0.001          |
| C×F         | 0.284                                    | 0.001          | C×F         | 0.228                                    | 0.001          | C×F         | 0.862                                    | 0.001          |
| C×H         | 0.710                                    | 0.001          | C×H         | 0.213                                    | 0.001          | C×H         | 0.152                                    | 0.001          |
| C×M         | 0.263                                    | 0.001          | C×M         | 0.028                                    | 0.305          | C×M         | 0.052                                    | 0.181          |
| F×H         | 0.716                                    | 0.001          | F×H         | 0.181                                    | 0.001          | F×H         | 0.960                                    | 0.001          |
| F×M         | 0.217                                    | 0.001          | F×M         | 0.064                                    | 0.033          | F×M         | 0.271                                    | 0.001          |
| H×M         | 0.206                                    | 0.001          | H×M         | 0.139                                    | 0.001          | H×M         | 0.120                                    | 0.001          |

  

| <i>PUo1</i> | <i>Pearson's Correlation Coefficient</i> | <i>p Value</i> | <i>PVu1</i> | <i>Pearson's Correlation Coefficient</i> | <i>p Value</i> | <i>PYp1</i> | <i>Pearson's Correlation Coefficient</i> | <i>p Value</i> |
|-------------|------------------------------------------|----------------|-------------|------------------------------------------|----------------|-------------|------------------------------------------|----------------|
| A×B         | 0.042                                    | 0.197          | A×B         | 0.197                                    | 0.001          | A×B         | 0.036                                    | 0.271          |
| A×C         | 0.370                                    | 0.001          | A×C         | 0.598                                    | 0.001          | A×C         | 0.093                                    | 0.001          |
| A×F         | 0.085                                    | 0.005          | A×F         | 0.592                                    | 0.001          | A×F         | 0.052                                    | 0.105          |
| A×H         | 0.154                                    | 0.001          | A×H         | 0.631                                    | 0.001          | A×H         | 0.062                                    | 0.065          |
| A×M         | -0.010                                   | 0.743          | A×M         | 0.089                                    | 0.009          | A×M         | 0.007                                    | 0.793          |
| B×C         | 0.705                                    | 0.001          | B×C         | 0.233                                    | 0.001          | B×C         | 0.012                                    | 0.695          |
| B×F         | 0.334                                    | 0.001          | B×F         | 0.244                                    | 0.001          | B×F         | -0.006                                   | 0.797          |
| B×H         | 0.019                                    | 0.493          | B×H         | 0.242                                    | 0.001          | B×H         | 0.012                                    | 0.723          |
| B×M         | 0.352                                    | 0.001          | B×M         | 0.033                                    | 0.289          | B×M         | -0.013                                   | 0.631          |
| C×F         | 0.580                                    | 0.001          | C×F         | 0.188                                    | 0.001          | C×F         | 0.003                                    | 0.935          |
| C×H         | 0.565                                    | 0.001          | C×H         | -0.001                                   | 0.963          | C×H         | -0.011                                   | 0.725          |
| C×M         | 0.292                                    | 0.001          | C×M         | 0.293                                    | 0.001          | C×M         | 0.021                                    | 0.443          |
| F×H         | 0.243                                    | 0.001          | F×H         | 0.002                                    | 0.947          | F×H         | -0.001                                   | 0.973          |
| F×M         | 0.075                                    | 0.017          | F×M         | 0.238                                    | 0.001          | F×M         | -0.004                                   | 0.899          |
| H×M         | 0.174                                    | 0.001          | H×M         | 0.240                                    | 0.001          | H×M         | -0.001                                   | 0.927          |

A, axillary lymph node; B, basal ganglia; C, cerebellum; F, midfrontal cortex; H, hippocampus; M, mesenteric lymph node.

SUPPLEMENTARY TABLE 2. MANTEL'S TEST RESULTS FOR INTER-TISSUE COMPARTMENTALIZATION OF NEF IN SIVsMMFGb-INFECTED PIGTAILED MACAQUES

| <i>PHt1</i> | <i>Pearson's Correlation Coefficient</i> | <i>p Value</i> | <i>PKs1</i> | <i>Pearson's Correlation Coefficient</i> | <i>p Value</i> | <i>PRv1</i> | <i>Pearson's Correlation Coefficient</i> | <i>p Value</i> |
|-------------|------------------------------------------|----------------|-------------|------------------------------------------|----------------|-------------|------------------------------------------|----------------|
| A×B         | 0.689                                    | 0.001          | A×B         | 0.144                                    | 0.001          | A×B         | 0.160                                    | 0.001          |
| A×C         | 0.301                                    | 0.001          | A×C         | 0.233                                    | 0.001          | A×C         | 0.304                                    | 0.001          |
| A×F         | 0.392                                    | 0.001          | A×F         | 0.178                                    | 0.001          | A×F         | 0.187                                    | 0.001          |
| A×H         | 0.374                                    | 0.001          | A×H         | 0.129                                    | 0.001          | A×H         | 0.163                                    | 0.001          |
| A×M         | 0.037                                    | 0.173          | A×M         | 0.004                                    | 0.919          | A×M         | -0.020                                   | 0.561          |
| B×C         | 0.586                                    | 0.001          | B×C         | 0.369                                    | 0.001          | B×C         | 0.387                                    | 0.001          |
| B×F         | 0.981                                    | 0.001          | B×F         | 0.393                                    | 0.001          | B×F         | 0.274                                    | 0.001          |
| B×H         | 0.983                                    | 0.001          | B×H         | 0.316                                    | 0.001          | B×H         | 0.115                                    | 0.001          |
| B×M         | 0.793                                    | 0.001          | B×M         | 0.228                                    | 0.001          | B×M         | 0.231                                    | 0.001          |
| C×F         | 0.513                                    | 0.001          | C×F         | 0.319                                    | 0.001          | C×F         | 0.201                                    | 0.001          |
| C×H         | 0.577                                    | 0.001          | C×H         | 0.208                                    | 0.001          | C×H         | 0.190                                    | 0.001          |
| C×M         | 0.390                                    | 0.001          | C×M         | 0.220                                    | 0.001          | C×M         | 0.330                                    | 0.001          |
| F×H         | 0.948                                    | 0.001          | F×H         | 0.228                                    | 0.001          | F×H         | 0.154                                    | 0.001          |
| F×M         | 0.410                                    | 0.001          | F×M         | 0.163                                    | 0.001          | F×M         | 0.171                                    | 0.001          |
| H×M         | 0.356                                    | 0.001          | H×M         | 0.244                                    | 0.001          | H×M         | 0.166                                    | 0.001          |

  

| <i>PUo1</i> | <i>Pearson's Correlation Coefficient</i> | <i>p Value</i> | <i>PVu1</i> | <i>Pearson's Correlation Coefficient</i> | <i>p Value</i> | <i>PYP1</i> | <i>Pearson's Correlation Coefficient</i> | <i>p Value</i> |
|-------------|------------------------------------------|----------------|-------------|------------------------------------------|----------------|-------------|------------------------------------------|----------------|
| A×B         | 0.511                                    | 0.001          | A×B         | 0.310                                    | 0.001          | A×B         | 0.364                                    | 0.001          |
| A×C         | 0.503                                    | 0.001          | A×C         | 0.340                                    | 0.001          | A×C         | 0.702                                    | 0.001          |
| A×F         | 0.104                                    | 0.007          | A×F         | 0.203                                    | 0.001          | A×F         | 0.667                                    | 0.001          |
| A×H         | 0.223                                    | 0.001          | A×H         | 0.216                                    | 0.001          | A×H         | 0.607                                    | 0.001          |
| A×M         | -0.010                                   | 0.761          | A×M         | 0.025                                    | 0.383          | A×M         | 0.045                                    | 0.105          |
| B×C         | 0.741                                    | 0.001          | B×C         | 0.434                                    | 0.001          | B×C         | -0.021                                   | 0.401          |
| B×F         | 0.435                                    | 0.001          | B×F         | 0.012                                    | 0.621          | B×F         | -0.042                                   | 0.115          |
| B×H         | 0.527                                    | 0.001          | B×H         | 0.102                                    | 0.001          | B×H         | -0.008                                   | 0.739          |
| B×M         | 0.497                                    | 0.001          | B×M         | 0.175                                    | 0.001          | B×M         | 0.346                                    | 0.001          |
| C×F         | 0.579                                    | 0.001          | C×F         | 0.368                                    | 0.001          | C×F         | 0.021                                    | 0.461          |
| C×H         | 0.463                                    | 0.001          | C×H         | 0.187                                    | 0.001          | C×H         | 0.088                                    | 0.009          |
| C×M         | 0.536                                    | 0.001          | C×M         | 0.316                                    | 0.001          | C×M         | 0.774                                    | 0.001          |
| F×H         | 0.197                                    | 0.001          | F×H         | 0.025                                    | 0.361          | F×H         | 0.035                                    | 0.277          |
| F×M         | 0.135                                    | 0.001          | F×M         | 0.099                                    | 0.001          | F×M         | 0.730                                    | 0.001          |
| H×M         | 0.267                                    | 0.001          | H×M         | 0.097                                    | 0.001          | H×M         | 0.636                                    | 0.001          |

A, axillary lymph node; B, basal ganglia; C, cerebellum; F, midfrontal cortex; H, hippocampus; M, mesenteric lymph node.

SUPPLEMENTARY TABLE 3. MANTEL'S TEST RESULTS FOR INTER-TISSUE COMPARTMENTALIZATION OF *INT* IN SIVSMMFGB-INFECTED PIGTAILED MACAQUES

| <i>PHt1</i> | <i>Pearson's Correlation Coefficient</i> | <i>p Value</i> | <i>PKs1</i> | <i>Pearson's Correlation Coefficient</i> | <i>p Value</i> | <i>PRv1</i> | <i>Pearson's Correlation Coefficient</i> | <i>p Value</i> |
|-------------|------------------------------------------|----------------|-------------|------------------------------------------|----------------|-------------|------------------------------------------|----------------|
| A×B         | 0.177                                    | 0.001          | A×B         | 0.610                                    | 0.001          | A×B         | 0.480                                    | 0.001          |
| A×C         | 0.054                                    | 0.079          | A×C         | 0.514                                    | 0.001          | A×C         | 0.182                                    | 0.001          |
| A×F         | 0.488                                    | 0.001          | A×F         | 0.329                                    | 0.001          | A×F         | 0.262                                    | 0.001          |
| A×H         | 0.303                                    | 0.001          | A×H         | 0.104                                    | 0.003          | A×H         | 0.545                                    | 0.001          |
| A×M         | 0.004                                    | 0.945          | A×M         | 0.002                                    | 0.955          | A×M         | 0.053                                    | 0.119          |
| B×C         | 0.339                                    | 0.001          | B×C         | 0.964                                    | 0.001          | B×C         | 0.469                                    | 0.001          |
| B×F         | 0.719                                    | 0.001          | B×F         | 0.818                                    | 0.001          | B×F         | 0.653                                    | 0.001          |
| B×H         | 0.356                                    | 0.001          | B×H         | 0.685                                    | 0.001          | B×H         | 0.003                                    | 0.987          |
| B×M         | 0.208                                    | 0.001          | B×M         | 0.613                                    | 0.001          | B×M         | 0.426                                    | 0.001          |
| C×F         | 0.646                                    | 0.001          | C×F         | 0.835                                    | 0.001          | C×F         | 0.322                                    | 0.001          |
| C×H         | 0.342                                    | 0.001          | C×H         | 0.574                                    | 0.001          | C×H         | 0.534                                    | 0.001          |
| C×M         | 0.117                                    | 0.001          | C×M         | 0.604                                    | 0.001          | C×M         | 0.133                                    | 0.001          |
| F×H         | 0.719                                    | 0.001          | F×H         | 0.333                                    | 0.001          | F×H         | 0.717                                    | 0.001          |
| F×M         | 0.502                                    | 0.001          | F×M         | 0.296                                    | 0.001          | F×M         | 0.255                                    | 0.001          |
| H×M         | 0.371                                    | 0.001          | H×M         | 0.099                                    | 0.001          | H×M         | 0.491                                    | 0.001          |

  

| <i>PUo1</i> | <i>Pearson's Correlation Coefficient</i> | <i>p Value</i> | <i>PVu1</i> | <i>Pearson's Correlation Coefficient</i> | <i>p Value</i> | <i>PYp1</i> | <i>Pearson's Correlation Coefficient</i> | <i>p Value</i> |
|-------------|------------------------------------------|----------------|-------------|------------------------------------------|----------------|-------------|------------------------------------------|----------------|
| A×B         | 0.188                                    | 0.001          | A×B         | 0.400                                    | 0.001          | A×B         | 0.262                                    | 0.001          |
| A×C         | 0.333                                    | 0.001          | A×C         | 0.090                                    | 0.003          | A×C         | 0.504                                    | 0.001          |
| A×F         | 0.438                                    | 0.001          | A×F         | 0.106                                    | 0.001          | A×F         | 0.669                                    | 0.001          |
| A×H         | 0.070                                    | 0.029          | A×H         | 0.160                                    | 0.001          | A×H         | 0.362                                    | 0.001          |
| A×M         | -0.003                                   | 0.939          | A×M         | 0.383                                    | 0.001          | A×M         | 0.031                                    | 0.369          |
| B×C         | 0.407                                    | 0.001          | B×C         | 0.248                                    | 0.001          | B×C         | 0.046                                    | 0.121          |
| B×F         | 0.476                                    | 0.001          | B×F         | 0.088                                    | 0.003          | B×F         | 0.134                                    | 0.001          |
| B×H         | 0.222                                    | 0.001          | B×H         | 0.088                                    | 0.001          | B×H         | 0.024                                    | 0.439          |
| B×M         | 0.113                                    | 0.001          | B×M         | 0.001                                    | 0.957          | B×M         | 0.310                                    | 0.001          |
| C×F         | 0.513                                    | 0.001          | C×F         | 0.096                                    | 0.001          | C×F         | 0.011                                    | 0.735          |
| C×H         | 0.352                                    | 0.001          | C×H         | 0.049                                    | 0.590          | C×H         | 0.034                                    | 0.303          |
| C×M         | 0.317                                    | 0.001          | C×M         | 0.241                                    | 0.001          | C×M         | 0.528                                    | 0.001          |
| F×H         | 0.493                                    | 0.001          | F×H         | 0.035                                    | 0.291          | F×H         | 0.077                                    | 0.015          |
| F×M         | 0.446                                    | 0.001          | F×M         | 0.100                                    | 0.001          | F×M         | 0.719                                    | 0.001          |
| H×M         | 0.060                                    | 0.061          | H×M         | 0.067                                    | 0.011          | H×M         | 0.359                                    | 0.001          |

A, axillary lymph node; B, basal ganglia; C, cerebellum; F, midfrontal cortex; H, hippocampus; M, mesenteric lymph node.
